# Supplementary material for: PHF6 mutation is associated with poor outcome in acute myeloid leukaemia
Source: PubMed Central journal article supplement (PMC9939093; doi:10.1002/cam4.5173), 2022-09-29
Supplement: CAM4-12-2795-s001.pdf [file CAM4-12-2795-s001.pdf]

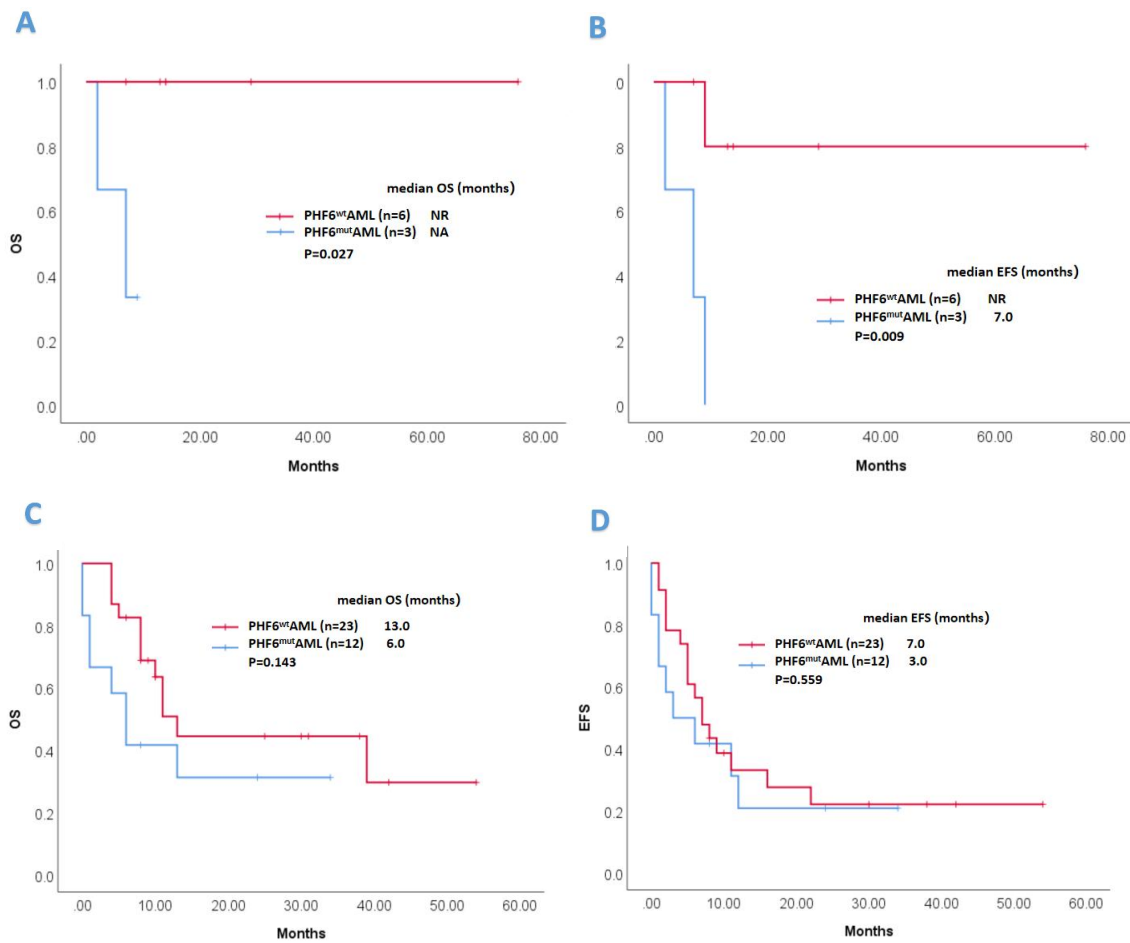

**Supplementary Figure S1. Kaplan-Meier survival curves comparing survival in different patients with AML.**

Abbreviations: OS, overall survival; EFS, event-free survival; NR, not reached; NA, not available.

A-B: OS and EFS in PHF6<sup>mut</sup>AML and PHF6<sup>wt</sup>AML patients who were assigned to the favourable prognosis group according to ELN 2017 risk categories. C-D: OS and EFS in PHF6<sup>mut</sup>AML and PHF6<sup>wt</sup>AML patients who were assigned to the poor prognosis group.
